# Supplementary material for: In silico study of MMP inhibition
Source: Royal Society of Chemistry journal article supplement (doi:10.1039/b910543c), 2009-01-01
Supplement: b910543c.pdf [file b910543c.pdf]

## ***Electronic Supporting information***

### ***In silico* study MMP inhibition**

*Matthieu Rouffet,<sup>†</sup> Clément Denhez,<sup>†</sup> Erika Bourguet,<sup>†</sup> Frédéric Bohr,<sup>‡</sup>*

*Dominique Guillaume<sup>†,\*</sup>*

<sup>†</sup> ICMR, CNRS UMR6229, Université de Reims Champagne-Ardenne, 51 Rue Cognacq Jay, 51096 Reims Cedex, France

<sup>‡</sup> LACM-DTI, EA 3304 URA CEA-Université LRC DSM 0534, Equipe de Chimie Théorique, UFR Sciences Exactes et Naturelles, Université de Reims Champagne-Ardenne, Moulin de la Housse BP 1039, 51687 Reims Cedex 2, France

[dominique.guillaume@univ-reims.fr](mailto:dominique.guillaume@univ-reims.fr)

### **TABLE OF CONTENTS**

|                                                                                                                                                              |            |
|--------------------------------------------------------------------------------------------------------------------------------------------------------------|------------|
| <b>1. Materials.....</b>                                                                                                                                     | <b>S2</b>  |
| <b>2. Calculated torsion angles (degrees) for free (unindexed) and zinc-bound ligands 3-10 in type I (a) and type II (b).....</b>                            | <b>S4</b>  |
| <b>3. Coordinates and Energies for free ligands .....</b>                                                                                                    | <b>S4</b>  |
| <b>4. Coordinates and Energies for free deprotonated ligands.....</b>                                                                                        | <b>S22</b> |
| <b>5. Coordinates and Energies for [Zn(II)-Ligand] complexes .....</b>                                                                                       | <b>S27</b> |
| <b>6. Calculated torsion angles (degrees) for free (unindexed) and active-site-model bound ligands 3-10, and 12-13 in neutral and deprotonated form.....</b> | <b>S42</b> |
| <b>7. Coordinates and Energies for [(NMI)<sub>3</sub>Zn(II)-Ligand] complexes in neutral form ....</b>                                                       | <b>S43</b> |
| <b>8. Coordinates and Energies for [(NMI)<sub>3</sub>Zn(II)-Deprotonated Ligand] complexes.....</b>                                                          | <b>S64</b> |

## 1. *Materials*

HF-DFT calculations were performed using the Gaussian03 package. All structures were fully optimized by using the B3LYP hybrid functional. Two basis sets have been used : the LanL2DZ basis set for the Zn atom and the 6-31G\*\* basis set for the other atoms. Thermochemical corrections were obtained from harmonic frequency analysis of the optimized structures for standard conditions.

Gaussian 03, Revision D.02,

M. J. Frisch, G. W. Trucks, H. B. Schlegel, G. E. Scuseria, M. A. Robb, J. R. Cheeseman, J. A. Montgomery, Jr., T. Vreven, K. N. Kudin, J. C. Burant, J. M. Millam, S. S. Iyengar, J. Tomasi, V. Barone, B. Mennucci, M. Cossi, G. Scalmani, N. Rega, G. A. Petersson, H. Nakatsuji, M. Hada, M. Ehara, K. Toyota, R. Fukuda, J. Hasegawa, M. Ishida, T. Nakajima, Y. Honda, O. Kitao, H. Nakai, M. Klene, X. Li, J. E. Knox, H. P. Hratchian, J. B. Cross, V. Bakken, C. Adamo, J. Jaramillo, R. Gomperts, R. E. Stratmann, O. Yazyev, A. J. Austin, R. Cammi, C. Pomelli, J. W. Ochterski, P. Y. Ayala, K. Morokuma, G. A. Voth, P. Salvador, J. J. Dannenberg, V. G. Zakrzewski, S. Dapprich, A. D. Daniels, M. C. Strain, O. Farkas, D. K. Malick, A. D. Rabuck, K. Raghavachari, J. B. Foresman, J. V. Ortiz, Q. Cui, A. G. Baboul, S. Clifford, J. Cioslowski, B. B. Stefanov, G. Liu, A. Liashenko, P. Piskorz, I. Komaromi, R. L. Martin, D. J. Fox, T. Keith, M. A. Al-Laham, C. Y. Peng, A. Nanayakkara, M. Challacombe, P. M. W. Gill, B. Johnson, W. Chen, M. W. Wong, C. Gonzalez, and J. A. Pople, Gaussian, Inc., Wallingford CT, 2004.

All HF-DFT representations have been made using VMD software developed by the Theoretical and Computational Biophysics Group in the Beckman Institute for Advanced Science and Technology at the University of Illinois at Urbana-Champaign.

<http://www.ks.uiuc.edu/Research/vmd/>

Humphrey, W.; Dalke, A.; Schulten, K. "VMD -Visual Molecular Dynamics" *J. Molecular Graphics*, **1996**, *14*, 33-38.

Molecular graphics images of docking were produced using the UCSF Chimera package from the Resource for Biocomputing, Visualization, and Informatics at the University of California, San Francisco (supported by NIH P41 RR-01081).

Pettersen, E.F., Goddard, T.D., Huang, C.C., Couch, G.S., Greenblatt, D.M., Meng, E.C., and Ferrin, T.E. "UCSF Chimera - A Visualization System for Exploratory Research and Analysis." *J. Comput. Chem.* **2004**, *25*, 1605-1612.

Affinity grid maps were calculated for each atom type constituting the MMPs with AutoGrid program. Grid maps were centered on the MMP catalytic site, with 120 x 120 x 120 grid points and a spacing of 0.214 Å between the grid points. The distance-dependent dielectric permittivity of Mehler and Solmajer<sup>1</sup> was used for the calculations of the electrostatic grid maps. Random starting positions on the entire protein surface, random orientations and torsions were used for all ligands. The AutoDock program, version 4.1 was used for docking computations, with a Lamarckian genetic algorithm.<sup>2</sup> Each docking experiment was performed with two runs constituted of a series of 250 simulations. Each docking simulation was carried out with an initial population of 250 individuals, a maximum number of 5,000,000 energy evaluations and a maximum number of 50,000 generations. The pseudo-Solis and Wets modification methods were used with default parameters. Docked conformations of the ligands were clustered with a root mean square deviation (RMSD) cut-off of 0.5 Å.

Michel F. Sanner, M. F. *J. Mol. Graphics Mod.* **1999**, *17*, 57-61.

---

<sup>1</sup> Mehler, E. L.; Solmajer, T. *Protein Eng.* **1991**, *4*, 903.

<sup>2</sup> (a) Morris, G. M.; Goodsell, D. S.; Halliday, R. S.; Huey, R.; Hart, W. E.; Belew, R. K.; Olson, A. J. *J. Comput. Chem.* **1998**, *19*, 1639; (b) Huey, R.; Morris, G. M.; Olson, A. J.; Goodsell, D. S. *J. Comput. Chem.* **2007**, *28*, 1145.

2. *Calculated torsion angles (degrees) for free (unindexed) and zinc-bound ligands 3-10 in type I (a) and type II (b)*

| Ligand          | 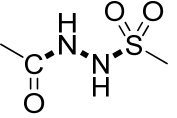 |  |  |
|-----------------|-----------------------------------------------------------------------------------|-----------------------------------------------------------------------------------|------------------------------------------------------------------------------------|
| <b>3 trans</b>  | -92.9                                                                             | -136.8                                                                            | -101.9                                                                             |
| <b>3a</b>       | -136.5                                                                            | -62.9                                                                             | -90.7                                                                              |
| <b>3b</b>       | -106.9                                                                            | -39.1                                                                             | -28.0                                                                              |
| <b>4 trans</b>  | -96.8                                                                             | -138.0                                                                            | -92.2                                                                              |
| <b>4 cis</b>    | -103.7                                                                            | -75.9                                                                             | -61.4                                                                              |
| <b>4a</b>       | -107.1                                                                            | -50.1                                                                             | 147.6                                                                              |
| <b>4b</b>       | -106.4                                                                            | -40.7                                                                             | -24.6                                                                              |
| <b>5 trans</b>  | -97.5                                                                             | -138.2                                                                            | -91.0                                                                              |
| <b>5 cis</b>    | -104.2                                                                            | -76.1                                                                             | -60.8                                                                              |
| <b>5a</b>       | -106.5                                                                            | -50.1                                                                             | 147.1                                                                              |
| <b>5b</b>       | -105.9                                                                            | -40.3                                                                             | -23.0                                                                              |
| <b>6 trans</b>  | -97.5                                                                             | -138.0                                                                            | -90.8                                                                              |
| <b>6 cis</b>    | -103.4                                                                            | -76.2                                                                             | -61.7                                                                              |
| <b>6a</b>       | -105.8                                                                            | -50.9                                                                             | 146.1                                                                              |
| <b>6b</b>       | -100.2                                                                            | -35.6                                                                             | -20.3                                                                              |
| <b>7 trans</b>  | -97.3                                                                             | -138.4                                                                            | -90.6                                                                              |
| <b>7 cis</b>    | -104.7                                                                            | -75.6                                                                             | -60.3                                                                              |
| <b>7a</b>       | -105.7                                                                            | -50.3                                                                             | 145.3                                                                              |
| <b>7b</b>       | -103.2                                                                            | -38.3                                                                             | -21.8                                                                              |
| <b>8 trans</b>  | -97.3                                                                             | -136.9                                                                            | -91.35                                                                             |
| <b>8 cis</b>    | -103.8                                                                            | -75.7                                                                             | -61.7                                                                              |
| <b>8a</b>       | -106.3                                                                            | -49.5                                                                             | 147.1                                                                              |
| <b>8b</b>       | -106.2                                                                            | -39.9                                                                             | -24.0                                                                              |
| <b>9 trans</b>  | -95.5                                                                             | -135.2                                                                            | -94.2                                                                              |
| <b>9a-1</b>     | -112.1                                                                            | -51.4                                                                             | 158.1                                                                              |
| <b>9a-2</b>     | -106.4                                                                            | -49.2                                                                             | 147.7                                                                              |
| <b>9b</b>       | -106.3                                                                            | -39.8                                                                             | -24.9                                                                              |
| <b>10 trans</b> | -80.1                                                                             | -163.2                                                                            | -117.6                                                                             |
| <b>10b-1</b>    | -118.4                                                                            | -45.8                                                                             | -1.0                                                                               |
| <b>10b-2</b>    | -103.2                                                                            | -46.7                                                                             | -166.4                                                                             |

3. *Coordinates and Energies for free ligands*

Zinc(II)

| Center Number | Atomic Number | Atomic Type | Coordinates (Angstroms) |          |          |
|---------------|---------------|-------------|-------------------------|----------|----------|
|               |               |             | X                       | Y        | Z        |
| 1             | 30            | 0           | 0.000000                | 0.000000 | 0.000000 |

SCF Done: E(RB+HF-LYP) = -64.6263106902 A.U. after 10 cycles  
 Zero-point correction= 0.000000 (Hartree/Particle)  
 Thermal correction to Energy= 0.001416  
 Thermal correction to Enthalpy= 0.002360  
 Thermal correction to Gibbs Free Energy= -0.015877  
 Sum of electronic and zero-point Energies= -64.626311  
 Sum of electronic and thermal Energies= -64.624894  
 Sum of electronic and thermal Enthalpies= -64.623950  
 Sum of electronic and thermal Free Energies= -64.642188

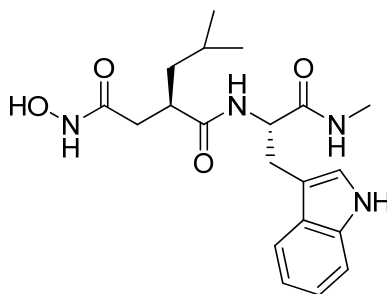

Galardine 1

| Center Number | Atomic Number | Atomic Type | Coordinates (Angstroms) |           |           |
|---------------|---------------|-------------|-------------------------|-----------|-----------|
|               |               |             | X                       | Y         | Z         |
| 1             | 7             | 0           | 4.777935                | -0.583256 | -2.200591 |
| 2             | 6             | 0           | 5.252730                | -0.158721 | -0.978183 |
| 3             | 6             | 0           | 4.142308                | 0.360218  | -0.255137 |
| 4             | 6             | 0           | 2.979934                | 0.224490  | -1.100260 |
| 5             | 6             | 0           | 3.418644                | -0.351180 | -2.268099 |
| 6             | 6             | 0           | 6.548370                | -0.177905 | -0.451790 |
| 7             | 6             | 0           | 6.731618                | 0.337793  | 0.825271  |
| 8             | 6             | 0           | 5.650252                | 0.866568  | 1.559445  |
| 9             | 6             | 0           | 4.365724                | 0.882971  | 1.031514  |
| 10            | 6             | 0           | 1.560217                | 0.588965  | -0.770190 |
| 11            | 6             | 0           | 0.678039                | -0.631566 | -0.388377 |
| 12            | 7             | 0           | -0.701517               | -0.231010 | -0.089682 |
| 13            | 6             | 0           | -1.593371               | 0.061814  | -1.084890 |
| 14            | 6             | 0           | -3.058466               | 0.245309  | -0.659564 |
| 15            | 6             | 0           | -3.665612               | -1.158650 | -0.425912 |
| 16            | 6             | 0           | -5.182788               | -1.115521 | -0.392770 |
| 17            | 7             | 0           | -5.786681               | -1.988063 | 0.463961  |
| 18            | 8             | 0           | -7.177718               | -1.858437 | 0.589506  |
| 19            | 6             | 0           | 1.224667                | -1.448980 | 0.792861  |
| 20            | 7             | 0           | 1.259115                | -0.776971 | 1.991439  |
| 21            | 6             | 0           | 1.892625                | -1.369537 | 3.161895  |
| 22            | 8             | 0           | 1.546932                | -2.621245 | 0.678656  |

Electronic Supporting Information for Rouffet *et al.*; *In silico* study of MMP inhibition

|    |   |   |           |           |           |
|----|---|---|-----------|-----------|-----------|
| 23 | 8 | 0 | -1.251746 | 0.119339  | -2.262134 |
| 24 | 6 | 0 | -3.306119 | 1.193734  | 0.534705  |
| 25 | 6 | 0 | -3.262714 | 2.701111  | 0.207242  |
| 26 | 1 | 0 | -4.302966 | 0.976290  | 0.937717  |
| 27 | 8 | 0 | -5.873017 | -0.415261 | -1.134992 |
| 28 | 1 | 0 | 7.382033  | -0.580525 | -1.020097 |
| 29 | 1 | 0 | 7.725019  | 0.337517  | 1.263554  |
| 30 | 1 | 0 | 5.829556  | 1.271011  | 2.551285  |
| 31 | 1 | 0 | 3.545560  | 1.304214  | 1.606707  |
| 32 | 1 | 0 | 5.330883  | -1.006097 | -2.927645 |
| 33 | 1 | 0 | 2.859309  | -0.616016 | -3.154536 |
| 34 | 1 | 0 | 1.536732  | 1.327985  | 0.040379  |
| 35 | 1 | 0 | 1.069951  | 1.058562  | -1.627427 |
| 36 | 1 | 0 | 0.660293  | -1.315643 | -1.239575 |
| 37 | 1 | 0 | 1.201455  | 0.231100  | 1.958971  |
| 38 | 1 | 0 | 1.421853  | -0.989721 | 4.072393  |
| 39 | 1 | 0 | 1.759098  | -2.449708 | 3.104919  |
| 40 | 1 | 0 | 2.967446  | -1.154881 | 3.193027  |
| 41 | 1 | 0 | -1.029697 | -0.341686 | 0.858070  |
| 42 | 1 | 0 | -3.556490 | 0.653893  | -1.542865 |
| 43 | 1 | 0 | -2.603951 | 0.980986  | 1.355038  |
| 44 | 1 | 0 | -3.380761 | -1.815060 | -1.257062 |
| 45 | 1 | 0 | -3.272733 | -1.619719 | 0.489058  |
| 46 | 6 | 0 | -3.672697 | 3.518929  | 1.440732  |
| 47 | 6 | 0 | -1.905206 | 3.173876  | -0.332767 |
| 48 | 1 | 0 | -4.014452 | 2.875332  | -0.575961 |
| 49 | 1 | 0 | -5.366782 | -2.249616 | 1.345472  |
| 50 | 1 | 0 | -7.355474 | -1.186822 | -0.106407 |
| 51 | 1 | 0 | -3.708394 | 4.588389  | 1.209209  |
| 52 | 1 | 0 | -4.660748 | 3.223427  | 1.810026  |
| 53 | 1 | 0 | -2.955441 | 3.382596  | 2.259881  |
| 54 | 1 | 0 | -1.926976 | 4.250353  | -0.532881 |
| 55 | 1 | 0 | -1.105717 | 2.989999  | 0.395512  |
| 56 | 1 | 0 | -1.635109 | 2.671452  | -1.265286 |

-----  
 SCF Done: E(RB+HF-LYP) = -1298.92992702 A.U. after 15 cycles  
 Zero-point correction= 0.470238 (Hartree/Particle)  
 Thermal correction to Energy= 0.499935  
 Thermal correction to Enthalpy= 0.500880  
 Thermal correction to Gibbs Free Energy= 0.404108  
 Sum of electronic and zero-point Energies= -1298.459689  
 Sum of electronic and thermal Energies= -1298.429992  
 Sum of electronic and thermal Enthalpies= -1298.429047  
 Sum of electronic and thermal Free Energies= -1298.525819  
 -----

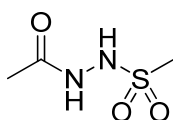

N'-acetylmethanesulfonylhydrazide **3**

*Trans conformation*

| Center Number | Atomic Number | Atomic Type | Coordinates (Angstroms) |           |           |
|---------------|---------------|-------------|-------------------------|-----------|-----------|
|               |               |             | X                       | Y         | Z         |
| 1             | 6             | 0           | -2.449498               | -1.240662 | -0.214277 |
| 2             | 16            | 0           | -1.361018               | 0.141406  | 0.170557  |
| 3             | 8             | 0           | -0.834511               | -0.066201 | 1.519327  |
| 4             | 8             | 0           | -2.018138               | 1.384410  | -0.238654 |
| 5             | 7             | 0           | -0.103192               | -0.101530 | -1.037675 |
| 6             | 7             | 0           | 1.053624                | -0.685961 | -0.530471 |
| 7             | 6             | 0           | 2.088305                | 0.122124  | -0.094699 |
| 8             | 6             | 0           | 3.337464                | -0.611638 | 0.342466  |
| 9             | 8             | 0           | 1.968307                | 1.335639  | -0.076858 |
| 10            | 1             | 0           | 0.129377                | 0.852566  | -1.336544 |
| 11            | 1             | 0           | 1.218002                | -1.639565 | -0.817761 |
| 12            | 1             | 0           | 3.299356                | -1.688314 | 0.157171  |
| 13            | 1             | 0           | 4.200512                | -0.182866 | -0.171965 |
| 14            | 1             | 0           | 3.473655                | -0.446339 | 1.414787  |
| 15            | 1             | 0           | -1.905257               | -2.172197 | -0.054102 |
| 16            | 1             | 0           | -3.294469               | -1.175447 | 0.473051  |
| 17            | 1             | 0           | -2.780804               | -1.147630 | -1.247985 |

-----

SCF Done: E(RB+HF-LYP) = -852.430341158 a.u. after 10 cycles  
Zero-point correction= 0.128816 (Hartree/Particle)  
Thermal correction to Energy= 0.139536  
Thermal correction to Enthalpy= 0.140480  
Thermal correction to Gibbs Free Energy= 0.091438  
Sum of electronic and zero-point Energies= -852.301526  
Sum of electronic and thermal Energies= -852.290805  
Sum of electronic and thermal Enthalpies= -852.289861  
Sum of electronic and thermal Free Energies= -852.338903

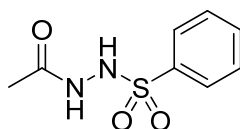N'-acetylbenzenesulfonylhydrazide **4***Trans conformation*

| Center Number | Atomic Number | Atomic Type | Coordinates (Angstroms) |           |           |
|---------------|---------------|-------------|-------------------------|-----------|-----------|
|               |               |             | X                       | Y         | Z         |
| 1             | 6             | 0           | -3.539473               | -0.012349 | -1.072376 |
| 2             | 6             | 0           | -2.329446               | 0.644041  | -0.856793 |
| 3             | 6             | 0           | -1.471549               | 0.165142  | 0.135764  |
| 4             | 6             | 0           | -1.800673               | -0.940288 | 0.920008  |
| 5             | 6             | 0           | -3.016289               | -1.588021 | 0.693672  |
| 6             | 6             | 0           | -3.880381               | -1.127021 | -0.300712 |
| 7             | 16            | 0           | 0.087201                | 1.006045  | 0.425177  |
| 8             | 8             | 0           | 0.632987                | 0.504042  | 1.687686  |
| 9             | 1             | 0           | -4.826112               | -1.632599 | -0.471604 |
| 10            | 8             | 0           | -0.077437               | 2.435133  | 0.147423  |

**Electronic Supporting Information for Rouffet *et al.*; *In silico* study of MMP inhibition**

|    |   |   |           |           |           |
|----|---|---|-----------|-----------|-----------|
| 11 | 7 | 0 | 1.036567  | 0.446085  | -0.943068 |
| 12 | 7 | 0 | 1.783252  | -0.698301 | -0.670198 |
| 13 | 6 | 0 | 3.113513  | -0.566663 | -0.315083 |
| 14 | 8 | 0 | 3.612665  | 0.533946  | -0.148722 |
| 15 | 6 | 0 | 3.868434  | -1.868998 | -0.157806 |
| 16 | 1 | 0 | 1.693522  | 1.215051  | -1.121718 |
| 17 | 1 | 0 | 1.439111  | -1.544302 | -1.101089 |
| 18 | 1 | 0 | 3.280536  | -2.749841 | -0.428906 |
| 19 | 1 | 0 | 4.773578  | -1.832197 | -0.768605 |
| 20 | 1 | 0 | 4.177146  | -1.961866 | 0.887019  |
| 21 | 1 | 0 | -1.119509 | -1.266551 | 1.697815  |
| 22 | 1 | 0 | -3.289380 | -2.447080 | 1.298681  |
| 23 | 1 | 0 | -4.219204 | 0.349016  | -1.837765 |
| 24 | 1 | 0 | -2.054185 | 1.519152  | -1.434939 |

```

-----
SCF Done: E(RB+HF-LYP) = -1044.16759387 a.u. after 11 cycles
Zero-point correction= 0.181856 (Hartree/Particle)
Thermal correction to Energy= 0.195695
Thermal correction to Enthalpy= 0.196640
Thermal correction to Gibbs Free Energy= 0.138595
Sum of electronic and zero-point Energies= -1043.985738
Sum of electronic and thermal Energies= -1043.971898
Sum of electronic and thermal Enthalpies= -1043.970954
Sum of electronic and thermal Free Energies= -1044.028999

```

***Cis conformation***

| Center<br>Number | Atomic<br>Number | Atomic<br>Type | Coordinates (Angstroms) |           |           |
|------------------|------------------|----------------|-------------------------|-----------|-----------|
|                  |                  |                | X                       | Y         | Z         |
| 1                | 6                | 0              | 1.364516                | -0.215419 | 0.159942  |
| 2                | 16               | 0              | -0.057962               | -1.301712 | 0.347342  |
| 3                | 8                | 0              | -3.757120               | -0.129380 | -0.115236 |
| 4                | 6                | 0              | -2.942278               | 0.742532  | -0.313933 |
| 5                | 6                | 0              | -3.216473               | 2.221269  | -0.091218 |
| 6                | 8                | 0              | -0.657950               | -1.006539 | 1.643874  |
| 7                | 8                | 0              | 0.331551                | -2.642939 | -0.085875 |
| 8                | 7                | 0              | -1.168013               | -0.795294 | -0.846549 |
| 9                | 7                | 0              | -1.650156               | 0.492754  | -0.783470 |
| 10               | 1                | 0              | -0.908747               | -1.122557 | -1.773573 |
| 11               | 1                | 0              | -0.986999               | 1.257387  | -0.854857 |
| 12               | 1                | 0              | -2.561927               | 2.879805  | -0.669916 |
| 13               | 1                | 0              | -4.255932               | 2.423317  | -0.352183 |
| 14               | 1                | 0              | -3.085219               | 2.448465  | 0.971890  |
| 15               | 6                | 0              | 2.386976                | -0.573491 | -0.723130 |
| 16               | 6                | 0              | 3.468861                | 0.289821  | -0.890045 |
| 17               | 6                | 0              | 3.521775                | 1.494307  | -0.183513 |
| 18               | 6                | 0              | 2.498678                | 1.837242  | 0.702432  |
| 19               | 6                | 0              | 1.411861                | 0.980054  | 0.882745  |
| 20               | 1                | 0              | 2.338636                | -1.522547 | -1.246163 |
| 21               | 1                | 0              | 4.274591                | 0.018586  | -1.565117 |
| 22               | 1                | 0              | 4.367981                | 2.161532  | -0.316414 |
| 23               | 1                | 0              | 2.551181                | 2.765243  | 1.263378  |
| 24               | 1                | 0              | 0.625662                | 1.208929  | 1.593838  |



Electronic Supporting Information for Rouffet *et al.*; *In silico* study of MMP inhibition

SCF Done: E(RB+HF-LYP) = -1044.15928482 a.u. after 11 cycles  
 Zero-point correction= 0.181703 (Hartree/Particle)  
 Thermal correction to Energy= 0.195556  
 Thermal correction to Enthalpy= 0.196500  
 Thermal correction to Gibbs Free Energy= 0.139040  
 Sum of electronic and zero-point Energies= -1043.977581  
 Sum of electronic and thermal Energies= -1043.963729  
 Sum of electronic and thermal Enthalpies= -1043.962785  
 Sum of electronic and thermal Free Energies= -1044.020245

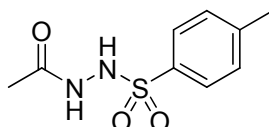

N'-acetyl-4-methylbenzenesulfonylhydrazide **5**

*Trans conformation*

| Center Number | Atomic Number | Atomic Type | Coordinates (Angstroms) |           |           |
|---------------|---------------|-------------|-------------------------|-----------|-----------|
|               |               |             | X                       | Y         | Z         |
| 1             | 6             | 0           | 1.892607                | -0.917803 | -0.829995 |
| 2             | 6             | 0           | 1.060402                | -0.425665 | 0.178234  |
| 3             | 6             | 0           | 1.488240                | 0.584395  | 1.038061  |
| 4             | 6             | 0           | 2.768576                | 1.113411  | 0.875511  |
| 5             | 6             | 0           | 3.624584                | 0.643777  | -0.128669 |
| 6             | 6             | 0           | 3.165799                | -0.377259 | -0.976688 |
| 7             | 16            | 0           | -0.578543               | -1.116813 | 0.382809  |
| 8             | 8             | 0           | -0.555496               | -2.535842 | 0.018097  |
| 9             | 7             | 0           | -1.432942               | -0.382123 | -0.965594 |
| 10            | 7             | 0           | -2.045356               | 0.827378  | -0.641696 |
| 11            | 6             | 0           | -3.390700               | 0.837485  | -0.322095 |
| 12            | 6             | 0           | -3.990813               | 2.211114  | -0.111315 |
| 13            | 8             | 0           | -1.103855               | -0.640939 | 1.664301  |
| 14            | 8             | 0           | -4.022003               | -0.202162 | -0.227029 |
| 15            | 1             | 0           | -2.172686               | -1.057872 | -1.191257 |
| 16            | 1             | 0           | -1.594464               | 1.647277  | -1.021699 |
| 17            | 1             | 0           | -3.287836               | 3.027663  | -0.295789 |
| 18            | 1             | 0           | -4.860279               | 2.324243  | -0.763459 |
| 19            | 1             | 0           | -4.341281               | 2.276566  | 0.922206  |
| 20            | 1             | 0           | 0.829011                | 0.934429  | 1.824543  |
| 21            | 1             | 0           | 3.108587                | 1.899576  | 1.544055  |
| 22            | 6             | 0           | 5.020712                | 1.196832  | -0.280486 |
| 23            | 1             | 0           | 3.818375                | -0.756049 | -1.758699 |
| 24            | 1             | 0           | 1.546331                | -1.715491 | -1.477927 |
| 25            | 1             | 0           | 5.302298                | 1.287623  | -1.333943 |
| 26            | 1             | 0           | 5.115163                | 2.181640  | 0.184553  |
| 27            | 1             | 0           | 5.755954                | 0.536451  | 0.195186  |

SCF Done: E(RB+HF-LYP) = -1083.48904493 a.u. after 11 cycles  
 Zero-point correction= 0.209249 (Hartree/Particle)  
 Thermal correction to Energy= 0.224975  
 Thermal correction to Enthalpy= 0.225919  
 Thermal correction to Gibbs Free Energy= 0.162672

**Electronic Supporting Information for Rouffet *et al.*; *In silico* study of MMP inhibition**

```
Sum of electronic and zero-point Energies=          -1083.279796
Sum of electronic and thermal Energies=            -1083.264070
Sum of electronic and thermal Enthalpies=          -1083.263126
Sum of electronic and thermal Free Energies=        -1083.326373
```

*Cis conformation*

| Center<br>Number | Atomic<br>Number | Atomic<br>Type | Coordinates (Angstroms) |           |           |
|------------------|------------------|----------------|-------------------------|-----------|-----------|
|                  |                  |                | X                       | Y         | Z         |
| 1                | 6                | 0              | 1.202811                | 0.564905  | 0.963819  |
| 2                | 6                | 0              | 0.944062                | -0.568822 | 0.189694  |
| 3                | 6                | 0              | 1.897733                | -1.055630 | -0.708565 |
| 4                | 6                | 0              | 3.114481                | -0.391059 | -0.832681 |
| 5                | 6                | 0              | 3.398542                | 0.754634  | -0.073285 |
| 6                | 6                | 0              | 2.426191                | 1.219182  | 0.822713  |
| 7                | 16               | 0              | -0.646147               | -1.393217 | 0.325058  |
| 8                | 7                | 0              | -1.632424               | -0.671274 | -0.868892 |
| 9                | 7                | 0              | -1.872771               | 0.681957  | -0.778719 |
| 10               | 6                | 0              | -3.106760               | 1.151998  | -0.323025 |
| 11               | 6                | 0              | -3.110272               | 2.649844  | -0.061472 |
| 12               | 8                | 0              | -1.211333               | -1.033378 | 1.621187  |
| 13               | 8                | 0              | -0.488903               | -2.770207 | -0.142200 |
| 14               | 8                | 0              | -4.072162               | 0.440208  | -0.163819 |
| 15               | 1                | 0              | -1.412329               | -1.013803 | -1.800640 |
| 16               | 1                | 0              | -1.078667               | 1.312930  | -0.810603 |
| 17               | 1                | 0              | -2.338515               | 3.192119  | -0.615888 |
| 18               | 1                | 0              | -4.091795               | 3.044737  | -0.326248 |
| 19               | 1                | 0              | -2.954382               | 2.822022  | 1.008611  |
| 20               | 1                | 0              | 1.690450                | -1.953229 | -1.281510 |
| 21               | 1                | 0              | 3.860685                | -0.771312 | -1.525070 |
| 22               | 6                | 0              | 4.734921                | 1.445525  | -0.192539 |
| 23               | 1                | 0              | 2.632499                | 2.098424  | 1.426947  |
| 24               | 1                | 0              | 0.465799                | 0.904063  | 1.683598  |
| 25               | 1                | 0              | 4.667255                | 2.501052  | 0.084592  |
| 26               | 1                | 0              | 5.474228                | 0.979843  | 0.470465  |
| 27               | 1                | 0              | 5.128424                | 1.383393  | -1.211202 |

```
SCF Done: E(RB+HF-LYP) = -1083.48084661 a.u. after 11 cycles
Zero-point correction= 0.209080 (Hartree/Particle)
Thermal correction to Energy= 0.224819
Thermal correction to Enthalpy= 0.225763
Thermal correction to Gibbs Free Energy= 0.163394
Sum of electronic and zero-point Energies= -1083.271766
Sum of electronic and thermal Energies= -1083.256028
Sum of electronic and thermal Enthalpies= -1083.255084
Sum of electronic and thermal Free Energies= -1083.317453
```

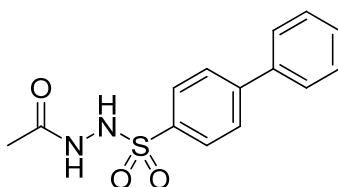N'-acetylbiphenyl-4-sulfonylhydrazide **6***Trans conformation*

| Center Number | Atomic Number | Atomic Type | Coordinates (Angstroms) |           |           |
|---------------|---------------|-------------|-------------------------|-----------|-----------|
|               |               |             | X                       | Y         | Z         |
| 1             | 6             | 0           | 0.271786                | -1.331131 | -0.815991 |
| 2             | 6             | 0           | -0.502201               | -0.775468 | 0.205020  |
| 3             | 6             | 0           | 0.063374                | 0.068540  | 1.160201  |
| 4             | 6             | 0           | 1.421296                | 0.368593  | 1.080759  |
| 5             | 6             | 0           | 2.225754                | -0.167953 | 0.061159  |
| 6             | 6             | 0           | 1.626313                | -1.024564 | -0.881400 |
| 7             | 16            | 0           | -2.246058               | -1.170988 | 0.302777  |
| 8             | 8             | 0           | -2.460053               | -2.537505 | -0.180616 |
| 9             | 7             | 0           | -2.893429               | -0.189162 | -1.002130 |
| 10            | 7             | 0           | -3.289922               | 1.083779  | -0.594971 |
| 11            | 6             | 0           | -4.624435               | 1.315878  | -0.315243 |
| 12            | 6             | 0           | -4.975508               | 2.755620  | -0.007258 |
| 13            | 8             | 0           | -2.732800               | -0.709927 | 1.604583  |
| 14            | 8             | 0           | -5.436070               | 0.405154  | -0.326050 |
| 15            | 1             | 0           | -3.732868               | -0.697509 | -1.305221 |
| 16            | 1             | 0           | -2.683111               | 1.833613  | -0.894259 |
| 17            | 1             | 0           | -4.131088               | 3.442290  | -0.109100 |
| 18            | 1             | 0           | -5.786000               | 3.073891  | -0.667395 |
| 19            | 1             | 0           | -5.346232               | 2.805354  | 1.020095  |
| 20            | 1             | 0           | -0.556149               | 0.474176  | 1.952194  |
| 21            | 1             | 0           | 1.859740                | 1.043740  | 1.808636  |
| 22            | 6             | 0           | 3.672765                | 0.154618  | -0.017658 |
| 23            | 1             | 0           | 2.237337                | -1.478684 | -1.654762 |
| 24            | 1             | 0           | -0.180556               | -2.009211 | -1.531248 |
| 25            | 6             | 0           | 4.302024                | 0.338846  | -1.260293 |
| 26            | 6             | 0           | 5.660057                | 0.642317  | -1.335458 |
| 27            | 6             | 0           | 6.417704                | 0.766381  | -0.169761 |
| 28            | 6             | 0           | 5.806042                | 0.584924  | 1.071685  |
| 29            | 6             | 0           | 4.447637                | 0.283029  | 1.147322  |
| 30            | 1             | 0           | 3.716465                | 0.269724  | -2.172109 |
| 31            | 1             | 0           | 6.125101                | 0.789367  | -2.305813 |
| 32            | 1             | 0           | 7.476106                | 1.001767  | -0.228291 |
| 33            | 1             | 0           | 6.389155                | 0.669684  | 1.983951  |
| 34            | 1             | 0           | 3.988228                | 0.115742  | 2.116772  |

-----

SCF Done: E(RB+HF-LYP) = -1275.23156972 a.u. after 11 cycles  
Zero-point correction= 0.262866 (Hartree/Particle)  
Thermal correction to Energy= 0.281345  
Thermal correction to Enthalpy= 0.282289  
Thermal correction to Gibbs Free Energy= 0.213039  
Sum of electronic and zero-point Energies= -1274.968704  
Sum of electronic and thermal Energies= -1274.950225  
Sum of electronic and thermal Enthalpies= -1274.949280  
Sum of electronic and thermal Free Energies= -1275.018531

*Cis conformation*

| Center Number | Atomic Number | Atomic Type | Coordinates (Angstroms) |           |           |
|---------------|---------------|-------------|-------------------------|-----------|-----------|
|               |               |             | X                       | Y         | Z         |
| 1             | 6             | 0           | -0.147629               | 0.106094  | 1.021634  |
| 2             | 6             | 0           | -0.632687               | -0.943732 | 0.236694  |
| 3             | 6             | 0           | 0.219390                | -1.652790 | -0.614118 |
| 4             | 6             | 0           | 1.562250                | -1.296325 | -0.684439 |
| 5             | 6             | 0           | 2.076630                | -0.235961 | 0.084257  |
| 6             | 6             | 0           | 1.198750                | 0.453223  | 0.939115  |
| 7             | 16            | 0           | -2.378530               | -1.362741 | 0.294383  |
| 8             | 7             | 0           | -3.110504               | -0.408587 | -0.918642 |
| 9             | 7             | 0           | -3.039778               | 0.961587  | -0.797793 |
| 10            | 6             | 0           | -4.152314               | 1.690734  | -0.369936 |
| 11            | 6             | 0           | -3.825113               | 3.142621  | -0.059083 |
| 12            | 8             | 0           | -2.894396               | -0.892368 | 1.575542  |
| 13            | 8             | 0           | -2.536341               | -2.731039 | -0.196888 |
| 14            | 8             | 0           | -5.259987               | 1.214825  | -0.268349 |
| 15            | 1             | 0           | -2.933819               | -0.774691 | -1.850598 |
| 16            | 1             | 0           | -2.121965               | 1.394080  | -0.778687 |
| 17            | 1             | 0           | -2.936794               | 3.510999  | -0.580842 |
| 18            | 1             | 0           | -4.685034               | 3.756226  | -0.329782 |
| 19            | 1             | 0           | -3.662006               | 3.245729  | 1.018870  |
| 20            | 1             | 0           | -0.168800               | -2.479403 | -1.199514 |
| 21            | 1             | 0           | 2.220209                | -1.835254 | -1.358539 |
| 22            | 6             | 0           | 3.510813                | 0.138289  | 0.003282  |
| 23            | 1             | 0           | 1.583481                | 1.245170  | 1.573601  |
| 24            | 1             | 0           | -0.811870               | 0.609369  | 1.715777  |
| 25            | 6             | 0           | 3.906863                | 1.485194  | 0.057905  |
| 26            | 6             | 0           | 5.253026                | 1.837157  | -0.018254 |
| 27            | 6             | 0           | 6.230847                | 0.849664  | -0.148252 |
| 28            | 6             | 0           | 5.851913                | -0.492601 | -0.202481 |
| 29            | 6             | 0           | 4.505669                | -0.844944 | -0.128644 |
| 30            | 1             | 0           | 3.152714                | 2.262854  | 0.133234  |
| 31            | 1             | 0           | 5.537783                | 2.884571  | 0.016654  |
| 32            | 1             | 0           | 7.279795                | 1.124033  | -0.206307 |
| 33            | 1             | 0           | 6.606173                | -1.268485 | -0.293795 |
| 34            | 1             | 0           | 4.223935                | -1.893417 | -0.143684 |

-----

SCF Done: E(RB+HF-LYP) = -1275.22329003 a.u. after 12 cycles  
Zero-point correction= 0.262656 (Hartree/Particle)  
Thermal correction to Energy= 0.281163  
Thermal correction to Enthalpy= 0.282107  
Thermal correction to Gibbs Free Energy= 0.213249  
Sum of electronic and zero-point Energies= -1274.960634  
Sum of electronic and thermal Energies= -1274.942127  
Sum of electronic and thermal Enthalpies= -1274.941183  
Sum of electronic and thermal Free Energies= -1275.010041

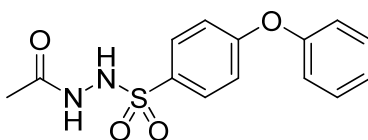

N'-acetyl-4-phenoxybenzenesulfonylhydrazide 7

*Trans conformation*

| Center Number | Atomic Number | Atomic Type | Coordinates (Angstroms) |           |           |
|---------------|---------------|-------------|-------------------------|-----------|-----------|
|               |               |             | X                       | Y         | Z         |
| 1             | 6             | 0           | 0.209711                | -0.832852 | -0.572200 |
| 2             | 6             | 0           | -0.774831               | -0.528397 | 0.370270  |
| 3             | 6             | 0           | -0.486504               | 0.274567  | 1.476688  |
| 4             | 6             | 0           | 0.798288                | 0.780047  | 1.636854  |
| 5             | 6             | 0           | 1.787802                | 0.480802  | 0.692144  |
| 6             | 6             | 0           | 1.495726                | -0.325579 | -0.416655 |
| 7             | 16            | 0           | -2.420827               | -1.191736 | 0.170493  |
| 8             | 8             | 0           | -2.341494               | -2.507753 | -0.469464 |
| 9             | 7             | 0           | -3.053914               | -0.174032 | -1.115129 |
| 10            | 7             | 0           | -3.703858               | 0.967522  | -0.649038 |
| 11            | 6             | 0           | -5.081878               | 0.961464  | -0.535398 |
| 12            | 6             | 0           | -5.699513               | 2.284441  | -0.135722 |
| 13            | 8             | 0           | -3.142651               | -0.967827 | 1.425121  |
| 14            | 8             | 0           | -5.725913               | -0.052412 | -0.749186 |
| 15            | 1             | 0           | -3.752719               | -0.764457 | -1.581683 |
| 16            | 1             | 0           | -3.195359               | 1.829966  | -0.781173 |
| 17            | 1             | 0           | -4.978638               | 3.104426  | -0.080685 |
| 18            | 1             | 0           | -6.487866               | 2.538893  | -0.847996 |
| 19            | 1             | 0           | -6.165933               | 2.162026  | 0.845684  |
| 20            | 1             | 0           | -1.261283               | 0.478331  | 2.207169  |
| 21            | 1             | 0           | 1.058282                | 1.400465  | 2.487456  |
| 22            | 8             | 0           | 3.011045                | 1.057612  | 0.910309  |
| 23            | 1             | 0           | 2.265329                | -0.553925 | -1.144073 |
| 24            | 1             | 0           | -0.029465               | -1.467983 | -1.418087 |
| 25            | 6             | 0           | 4.147265                | 0.578406  | 0.267463  |
| 26            | 6             | 0           | 4.866249                | 1.469043  | -0.527057 |
| 27            | 6             | 0           | 6.059483                | 1.046901  | -1.115239 |
| 28            | 6             | 0           | 6.522650                | -0.254310 | -0.914154 |
| 29            | 6             | 0           | 5.791676                | -1.135335 | -0.113676 |
| 30            | 6             | 0           | 4.602181                | -0.723294 | 0.486924  |
| 31            | 1             | 0           | 4.488150                | 2.476034  | -0.667647 |
| 32            | 1             | 0           | 6.624989                | 1.737837  | -1.733090 |
| 33            | 1             | 0           | 7.449983                | -0.579809 | -1.374905 |
| 34            | 1             | 0           | 6.151322                | -2.146181 | 0.053101  |
| 35            | 1             | 0           | 4.033125                | -1.394653 | 1.121510  |

-----

SCF Done: E(RB+HF-LYP) = -1350.43914712 a.u. after 12 cycles  
Zero-point correction= 0.266493 (Hartree/Particle)  
Thermal correction to Energy= 0.286090  
Thermal correction to Enthalpy= 0.287034  
Thermal correction to Gibbs Free Energy= 0.213500  
Sum of electronic and zero-point Energies= -1350.172654  
Sum of electronic and thermal Energies= -1350.153057  
Sum of electronic and thermal Enthalpies= -1350.152113  
Sum of electronic and thermal Free Energies= -1350.225647

Electronic Supporting Information for Rouffet *et al.*; *In silico* study of MMP inhibition

*Cis conformation*

| Center<br>Number | Atomic<br>Number | Atomic<br>Type | Coordinates (Angstroms) |           |           |
|------------------|------------------|----------------|-------------------------|-----------|-----------|
|                  |                  |                | X                       | Y         | Z         |
| 1                | 6                | 0              | -0.192597               | -0.075354 | 0.628027  |
| 2                | 6                | 0              | -0.984244               | -1.084390 | 0.073569  |
| 3                | 6                | 0              | -0.441849               | -1.992786 | -0.843960 |
| 4                | 6                | 0              | 0.893300                | -1.885028 | -1.207104 |
| 5                | 6                | 0              | 1.688395                | -0.868901 | -0.656817 |
| 6                | 6                | 0              | 1.147177                | 0.039322  | 0.261146  |
| 7                | 16               | 0              | -2.714576               | -1.204550 | 0.523216  |
| 8                | 7                | 0              | -3.557090               | -0.281899 | -0.643768 |
| 9                | 7                | 0              | -3.254005               | 1.057728  | -0.748230 |
| 10               | 6                | 0              | -4.125134               | 2.022152  | -0.237599 |
| 11               | 6                | 0              | -3.526779               | 3.420182  | -0.232669 |
| 12               | 8                | 0              | -2.876881               | -0.523128 | 1.803417  |
| 13               | 8                | 0              | -3.160515               | -2.573701 | 0.265636  |
| 14               | 8                | 0              | -5.243564               | 1.770918  | 0.150061  |
| 15               | 1                | 0              | -3.642897               | -0.778264 | -1.527129 |
| 16               | 1                | 0              | -2.301450               | 1.317588  | -0.982183 |
| 17               | 1                | 0              | -2.684046               | 3.540368  | -0.919879 |
| 18               | 1                | 0              | -4.310485               | 4.132786  | -0.493270 |
| 19               | 1                | 0              | -3.184810               | 3.652856  | 0.781051  |
| 20               | 1                | 0              | -1.059558               | -2.790620 | -1.242128 |
| 21               | 1                | 0              | 1.345991                | -2.580731 | -1.905071 |
| 22               | 8                | 0              | 2.980847                | -0.821496 | -1.103745 |
| 23               | 1                | 0              | 1.767013                | 0.817066  | 0.690712  |
| 24               | 1                | 0              | -0.620188               | 0.597012  | 1.363825  |
| 25               | 6                | 0              | 3.943776                | -0.092446 | -0.411656 |
| 26               | 6                | 0              | 4.316100                | -0.451209 | 0.885023  |
| 27               | 6                | 0              | 5.342647                | 0.253291  | 1.513782  |
| 28               | 6                | 0              | 5.994794                | 1.295240  | 0.850169  |
| 29               | 6                | 0              | 5.617338                | 1.634314  | -0.450025 |
| 30               | 6                | 0              | 4.585972                | 0.942752  | -1.087563 |
| 31               | 1                | 0              | 3.811479                | -1.271836 | 1.384231  |
| 32               | 1                | 0              | 5.638252                | -0.020351 | 2.522039  |
| 33               | 1                | 0              | 6.796207                | 1.836515  | 1.343031  |
| 34               | 1                | 0              | 6.124127                | 2.439977  | -0.972470 |
| 35               | 1                | 0              | 4.278768                | 1.186044  | -2.099117 |

```

SCF Done: E(RB+HF-LYP) = -1350.43091834 a.u. after 11 cycles
Zero-point correction= 0.266325 (Hartree/Particle)
Thermal correction to Energy= 0.285952
Thermal correction to Enthalpy= 0.286896
Thermal correction to Gibbs Free Energy= 0.214114
Sum of electronic and zero-point Energies= -1350.164593
Sum of electronic and thermal Energies= -1350.144967
Sum of electronic and thermal Enthalpies= -1350.144023
Sum of electronic and thermal Free Energies= -1350.216805

```

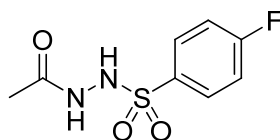N'-acetyl-4-fluorobenzenesulfonylhydrazide **8***Trans conformation*

| Center Number | Atomic Number | Atomic Type | Coordinates (Angstroms) |           |           |
|---------------|---------------|-------------|-------------------------|-----------|-----------|
|               |               |             | X                       | Y         | Z         |
| 1             | 6             | 0           | -1.927934               | 0.895420  | -0.829949 |
| 2             | 6             | 0           | -1.093765               | 0.397780  | 0.175358  |
| 3             | 6             | 0           | -1.511030               | -0.624344 | 1.029349  |
| 4             | 6             | 0           | -2.783415               | -1.170977 | 0.870177  |
| 5             | 6             | 0           | -3.600583               | -0.673564 | -0.139524 |
| 6             | 6             | 0           | -3.198498               | 0.352174  | -0.992338 |
| 7             | 16            | 0           | 0.537682                | 1.104559  | 0.390581  |
| 8             | 8             | 0           | 0.495433                | 2.525922  | 0.038930  |
| 9             | 7             | 0           | 1.402378                | 0.392267  | -0.960967 |
| 10            | 7             | 0           | 2.033599                | -0.809711 | -0.645171 |
| 11            | 6             | 0           | 3.379662                | -0.795567 | -0.322065 |
| 12            | 6             | 0           | 4.007478                | -2.158380 | -0.125070 |
| 13            | 8             | 0           | 1.059785                | 0.620944  | 1.669936  |
| 14            | 8             | 0           | 3.986855                | 0.256438  | -0.212070 |
| 15            | 1             | 0           | 2.130276                | 1.082125  | -1.183206 |
| 16            | 1             | 0           | 1.606484                | -1.631496 | -1.048424 |
| 17            | 1             | 0           | 3.324603                | -2.987147 | -0.329298 |
| 18            | 1             | 0           | 4.886238                | -2.242459 | -0.768994 |
| 19            | 1             | 0           | 4.348069                | -2.231790 | 0.911260  |
| 20            | 1             | 0           | -0.848113               | -0.969901 | 1.814389  |
| 21            | 1             | 0           | -3.148510               | -1.962163 | 1.515190  |
| 22            | 9             | 0           | -4.828470               | -1.198459 | -0.296161 |
| 23            | 1             | 0           | -3.878547               | 0.711307  | -1.756442 |
| 24            | 1             | 0           | -1.587098               | 1.705112  | -1.465351 |

SCF Done: E(RB+HF-LYP) = -1143.39891987 a.u. after 11 cycles  
 Zero-point correction= 0.173702 (Hartree/Particle)  
 Thermal correction to Energy= 0.188308  
 Thermal correction to Enthalpy= 0.189252  
 Thermal correction to Gibbs Free Energy= 0.129591  
 Sum of electronic and zero-point Energies= -1143.225217  
 Sum of electronic and thermal Energies= -1143.210612  
 Sum of electronic and thermal Enthalpies= -1143.209668  
 Sum of electronic and thermal Free Energies= -1143.269329

*Cis conformation*

| Center Number | Atomic Number | Atomic Type | Coordinates (Angstroms) |           |           |
|---------------|---------------|-------------|-------------------------|-----------|-----------|
|               |               |             | X                       | Y         | Z         |
| 1             | 6             | 0           | 1.227679                | 0.613996  | 0.958534  |
| 2             | 6             | 0           | 0.990439                | -0.526335 | 0.184305  |
| 3             | 6             | 0           | 1.952341                | -1.005824 | -0.711082 |

Electronic Supporting Information for Rouffet *et al.*; *In silico* study of MMP inhibition

|    |    |   |           |           |           |
|----|----|---|-----------|-----------|-----------|
| 4  | 6  | 0 | 3.162202  | -0.330469 | -0.844686 |
| 5  | 6  | 0 | 3.378892  | 0.811299  | -0.076950 |
| 6  | 6  | 0 | 2.436538  | 1.295065  | 0.825369  |
| 7  | 16 | 0 | -0.584041 | -1.380848 | 0.327666  |
| 8  | 7  | 0 | -1.589687 | -0.687991 | -0.861314 |
| 9  | 7  | 0 | -1.881648 | 0.653168  | -0.775758 |
| 10 | 6  | 0 | -3.131379 | 1.079909  | -0.318088 |
| 11 | 6  | 0 | -3.196650 | 2.580663  | -0.085430 |
| 12 | 8  | 0 | -1.145545 | -1.025464 | 1.626067  |
| 13 | 8  | 0 | -0.396203 | -2.755151 | -0.135019 |
| 14 | 8  | 0 | -4.061864 | 0.329140  | -0.134114 |
| 15 | 1  | 0 | -1.391402 | -1.042967 | -1.792941 |
| 16 | 1  | 0 | -1.119573 | 1.318419  | -0.850976 |
| 17 | 1  | 0 | -2.455700 | 3.144815  | -0.659664 |
| 18 | 1  | 0 | -4.197323 | 2.927435  | -0.345777 |
| 19 | 1  | 0 | -3.036409 | 2.780915  | 0.979097  |
| 20 | 1  | 0 | 1.758899  | -1.911615 | -1.275409 |
| 21 | 1  | 0 | 3.936488  | -0.676680 | -1.520017 |
| 22 | 9  | 0 | 4.545804  | 1.464809  | -0.206306 |
| 23 | 1  | 0 | 2.661410  | 2.177132  | 1.414347  |
| 24 | 1  | 0 | 0.483896  | 0.938557  | 1.677639  |

-----  
 SCF Done: E(RB+HF-LYP) = -1143.39022750 a.u. after 17 cycles  
 Zero-point correction= 0.173351 (Hartree/Particle)  
 Thermal correction to Energy= 0.188089  
 Thermal correction to Enthalpy= 0.189033  
 Thermal correction to Gibbs Free Energy= 0.129203  
 Sum of electronic and zero-point Energies= -1143.216877  
 Sum of electronic and thermal Energies= -1143.202139  
 Sum of electronic and thermal Enthalpies= -1143.201194  
 Sum of electronic and thermal Free Energies= -1143.261025

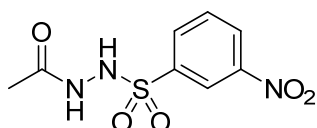

N'-acetyl-3-nitrobenzenesulfonylhydrazide **9**

*Trans* conformation

| Center Number | Atomic Number | Atomic Type | Coordinates (Angstroms) |           |           |
|---------------|---------------|-------------|-------------------------|-----------|-----------|
|               |               |             | X                       | Y         | Z         |
| 1             | 6             | 0           | 2.814094                | 0.188261  | -0.186141 |
| 2             | 6             | 0           | 1.623735                | -0.474187 | 0.090260  |
| 3             | 6             | 0           | 0.576704                | 0.280368  | 0.615884  |
| 4             | 6             | 0           | 0.711823                | 1.644971  | 0.874318  |
| 5             | 6             | 0           | 1.924678                | 2.277416  | 0.589106  |
| 6             | 6             | 0           | 2.985514                | 1.551673  | 0.053221  |
| 7             | 16            | 0           | -0.979612               | -0.538000 | 1.003309  |
| 8             | 8             | 0           | -1.785869               | 0.416675  | 1.764005  |
| 9             | 1             | 0           | 3.937488                | 2.012707  | -0.177602 |
| 10            | 8             | 0           | -0.691972               | -1.893195 | 1.473950  |
| 11            | 7             | 0           | -1.628747               | -0.796466 | -0.601544 |



Electronic Supporting Information for Rouffet *et al.*; *In silico* study of MMP inhibition

|    |   |   |           |           |           |
|----|---|---|-----------|-----------|-----------|
| 12 | 7 | 0 | -2.470053 | 0.224772  | -1.037433 |
| 13 | 6 | 0 | -3.839928 | 0.072025  | -0.880408 |
| 14 | 8 | 0 | -4.295400 | -0.879843 | -0.270684 |
| 15 | 6 | 0 | -4.683444 | 1.158282  | -1.510420 |
| 16 | 1 | 0 | -2.182323 | -1.657152 | -0.512113 |
| 17 | 1 | 0 | -2.097392 | 0.783772  | -1.792176 |
| 18 | 1 | 0 | -4.101065 | 1.889567  | -2.076738 |
| 19 | 1 | 0 | -5.426350 | 0.696830  | -2.165342 |
| 20 | 1 | 0 | -5.222003 | 1.679198  | -0.714135 |
| 21 | 1 | 0 | -0.121321 | 2.188822  | 1.305171  |
| 22 | 1 | 0 | 2.043041  | 3.336876  | 0.790205  |
| 23 | 7 | 0 | 3.939339  | -0.583100 | -0.750612 |
| 24 | 1 | 0 | 1.529599  | -1.537072 | -0.092809 |
| 25 | 8 | 0 | 4.982778  | 0.025188  | -0.981090 |
| 26 | 8 | 0 | 3.759374  | -1.780681 | -0.956831 |

-----  
 SCF Done: E(RB+HF-LYP) = -1248.66275812 a.u. after 11 cycles  
 Zero-point correction= 0.184353 (Hartree/Particle)  
 Thermal correction to Energy= 0.200682  
 Thermal correction to Enthalpy= 0.201626  
 Thermal correction to Gibbs Free Energy= 0.137149  
 Sum of electronic and zero-point Energies= -1248.478405  
 Sum of electronic and thermal Energies= -1248.462077  
 Sum of electronic and thermal Enthalpies= -1248.461132  
 Sum of electronic and thermal Free Energies= -1248.525609

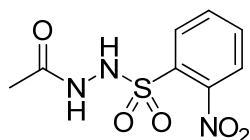

N'-acetyl-2-nitrobenzenesulfonylhydrazide **10**

*Trans* conformation

| Center Number | Atomic Number | Atomic Type | Coordinates (Angstroms) |           |           |
|---------------|---------------|-------------|-------------------------|-----------|-----------|
|               |               |             | X                       | Y         | Z         |
| 1             | 6             | 0           | -3.462696               | 0.388293  | -0.449225 |
| 2             | 6             | 0           | -2.114688               | 0.516287  | -0.124075 |
| 3             | 6             | 0           | -1.300341               | -0.613364 | 0.047930  |
| 4             | 6             | 0           | -1.871373               | -1.875806 | -0.113072 |
| 5             | 6             | 0           | -3.216789               | -2.009782 | -0.461295 |
| 6             | 6             | 0           | -4.013335               | -0.879082 | -0.626566 |
| 7             | 16            | 0           | 0.408907                | -0.614189 | 0.677505  |
| 8             | 8             | 0           | 0.793307                | -2.021900 | 0.832705  |
| 9             | 1             | 0           | -5.061124               | -0.976357 | -0.890663 |
| 10            | 8             | 0           | 0.474450                | 0.295056  | 1.821596  |
| 11            | 7             | 0           | 1.287988                | -0.106742 | -0.753600 |
| 12            | 7             | 0           | 2.600360                | -0.578306 | -0.728590 |
| 13            | 6             | 0           | 3.642179                | 0.260353  | -0.400268 |
| 14            | 8             | 0           | 3.444454                | 1.431961  | -0.119291 |
| 15            | 6             | 0           | 5.015583                | -0.375357 | -0.455683 |
| 16            | 1             | 0           | 1.324976                | 0.917708  | -0.755985 |
| 17            | 1             | 0           | 2.722006                | -1.532480 | -1.029006 |

Electronic Supporting Information for Rouffet *et al.*; *In silico* study of MMP inhibition

|    |   |   |           |           |           |
|----|---|---|-----------|-----------|-----------|
| 18 | 1 | 0 | 5.000334  | -1.424763 | -0.760864 |
| 19 | 1 | 0 | 5.641027  | 0.193346  | -1.148279 |
| 20 | 1 | 0 | 5.468773  | -0.301441 | 0.536356  |
| 21 | 1 | 0 | -1.248290 | -2.746442 | 0.053478  |
| 22 | 1 | 0 | -3.638934 | -3.001006 | -0.591273 |
| 23 | 1 | 0 | -4.055127 | 1.287439  | -0.563214 |
| 24 | 7 | 0 | -1.599524 | 1.893022  | -0.019465 |
| 25 | 8 | 0 | -2.397660 | 2.771961  | 0.286628  |
| 26 | 8 | 0 | -0.413197 | 2.083667  | -0.282327 |

```

-----
SCF Done: E(RB+HF-LYP) = -1248.65211362 a.u. after 13 cycles
Zero-point correction= 0.184259 (Hartree/Particle)
Thermal correction to Energy= 0.200683
Thermal correction to Enthalpy= 0.201627
Thermal correction to Gibbs Free Energy= 0.137735
Sum of electronic and zero-point Energies= -1248.467854
Sum of electronic and thermal Energies= -1248.451431
Sum of electronic and thermal Enthalpies= -1248.450486
Sum of electronic and thermal Free Energies= -1248.514379

```

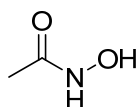

N-acetohydroxamic acid AHA 11

```

-----

```

| Center<br>Number | Atomic<br>Number | Atomic<br>Type | Coordinates (Angstroms) |           |           |
|------------------|------------------|----------------|-------------------------|-----------|-----------|
|                  |                  |                | X                       | Y         | Z         |
| 1                | 6                | 0              | 1.814909                | -0.443597 | 0.023444  |
| 2                | 1                | 0              | 1.810773                | -1.534957 | -0.039332 |
| 3                | 1                | 0              | 2.313881                | -0.135374 | 0.946314  |
| 4                | 1                | 0              | 2.392202                | -0.043124 | -0.813847 |
| 5                | 6                | 0              | 0.429216                | 0.155586  | -0.010468 |
| 6                | 8                | 0              | 0.195235                | 1.363678  | -0.002745 |
| 7                | 7                | 0              | -0.605138               | -0.732144 | -0.122593 |
| 8                | 1                | 0              | -0.552827               | -1.648633 | 0.302955  |
| 9                | 8                | 0              | -1.886525               | -0.183485 | 0.040264  |
| 10               | 1                | 0              | -1.662487               | 0.773621  | 0.084060  |

```

-----
SCF Done: E(RB+HF-LYP) = -284.382279266 a.u. after 9 cycles
Zero-point correction= 0.078065 (Hartree/Particle)
Thermal correction to Energy= 0.083843
Thermal correction to Enthalpy= 0.084787
Thermal correction to Gibbs Free Energy= 0.049332
Sum of electronic and zero-point Energies= -284.304214
Sum of electronic and thermal Energies= -284.298436
Sum of electronic and thermal Enthalpies= -284.297492
Sum of electronic and thermal Free Energies= -284.332948

```

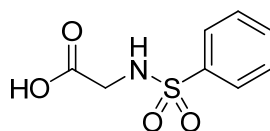2-(phenylsulfonamido)acetic acid **12**

| Center Number | Atomic Number | Atomic Type | Coordinates (Angstroms) |           |           |
|---------------|---------------|-------------|-------------------------|-----------|-----------|
|               |               |             | X                       | Y         | Z         |
| 1             | 6             | 0           | -3.170308               | -1.652745 | 0.063058  |
| 2             | 6             | 0           | -2.969386               | -0.843174 | -1.058374 |
| 3             | 6             | 0           | -1.984876               | 0.142872  | -1.042044 |
| 4             | 6             | 0           | -1.208564               | 0.298456  | 0.109423  |
| 5             | 6             | 0           | -1.404936               | -0.493226 | 1.241782  |
| 6             | 6             | 0           | -2.394507               | -1.476355 | 1.209754  |
| 7             | 1             | 0           | -0.803571               | -0.328189 | 2.128522  |
| 8             | 1             | 0           | -2.559551               | -2.100325 | 2.082216  |
| 9             | 1             | 0           | -3.938843               | -2.419305 | 0.043972  |
| 10            | 1             | 0           | -3.583957               | -0.974950 | -1.943235 |
| 11            | 1             | 0           | -1.828950               | 0.794376  | -1.894985 |
| 12            | 16            | 0           | 0.070342                | 1.553021  | 0.131508  |
| 13            | 8             | 0           | -0.314098               | 2.642141  | -0.768843 |
| 14            | 8             | 0           | 0.446063                | 1.783785  | 1.528782  |
| 15            | 7             | 0           | 1.381252                | 0.790116  | -0.683069 |
| 16            | 1             | 0           | 1.705988                | 1.459946  | -1.376332 |
| 17            | 6             | 0           | 2.450121                | 0.165559  | 0.111917  |
| 18            | 1             | 0           | 3.415217                | 0.632277  | -0.101861 |
| 19            | 1             | 0           | 2.265173                | 0.309928  | 1.180479  |
| 20            | 6             | 0           | 2.583224                | -1.341198 | -0.156359 |
| 21            | 8             | 0           | 1.678556                | -1.852503 | -1.007775 |
| 22            | 1             | 0           | 1.114813                | -1.109043 | -1.300406 |
| 23            | 8             | 0           | 3.441332                | -2.004047 | 0.370841  |

SCF Done: E(RB+HF-LYP) = -1064.05945495 A.U. after 15 cycles  
 Zero-point correction= 0.171338 (Hartree/Particle)  
 Thermal correction to Energy= 0.184283  
 Thermal correction to Enthalpy= 0.185227  
 Thermal correction to Gibbs Free Energy= 0.128846  
 Sum of electronic and zero-point Energies= -1063.888117  
 Sum of electronic and thermal Energies= -1063.875172  
 Sum of electronic and thermal Enthalpies= -1063.874228  
 Sum of electronic and thermal Free Energies= -1063.930609

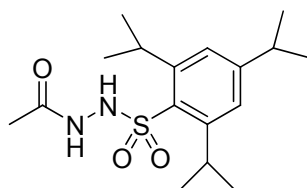N'-acetyl-2,4,6-triisopropylbenzenesulfonylhydrazide **13***Trans* conformation

**Electronic Supporting Information for Rouffet *et al.*; *In silico* study of MMP inhibition**

| Center<br>Number | Atomic<br>Number | Atomic<br>Type | Coordinates (Angstroms) |           |           |
|------------------|------------------|----------------|-------------------------|-----------|-----------|
|                  |                  |                | X                       | Y         | Z         |
| 1                | 6                | 0              | 2.868936                | -0.097561 | 0.320628  |
| 2                | 6                | 0              | 2.273169                | 1.160661  | 0.356516  |
| 3                | 6                | 0              | 0.930098                | 1.376522  | 0.028900  |
| 4                | 6                | 0              | 0.165277                | 0.250293  | -0.374326 |
| 5                | 6                | 0              | 0.708642                | -1.064025 | -0.344303 |
| 6                | 6                | 0              | 2.062039                | -1.186658 | -0.008507 |
| 7                | 16               | 0              | -1.502175               | 0.563323  | -1.035553 |
| 8                | 7                | 0              | -2.374150               | 0.984040  | 0.433274  |
| 9                | 7                | 0              | -2.797056               | -0.142279 | 1.147339  |
| 10               | 6                | 0              | -4.127127               | -0.519773 | 1.063124  |
| 11               | 6                | 0              | -4.535269               | -1.642411 | 1.992570  |
| 12               | 8                | 0              | -2.055774               | -0.648642 | -1.643493 |
| 13               | 8                | 0              | -1.515529               | 1.810182  | -1.806692 |
| 14               | 8                | 0              | -4.889628               | 0.032048  | 0.287346  |
| 15               | 6                | 0              | 4.344820                | -0.270593 | 0.650359  |
| 16               | 1                | 0              | -3.218644               | 1.470526  | 0.105280  |
| 17               | 1                | 0              | -2.271524               | -0.318996 | 1.992235  |
| 18               | 1                | 0              | -3.722711               | -1.995054 | 2.632981  |
| 19               | 1                | 0              | -5.369347               | -1.306215 | 2.613766  |
| 20               | 1                | 0              | -4.892334               | -2.477911 | 1.384750  |
| 21               | 6                | 0              | -0.049600               | -2.366255 | -0.638344 |
| 22               | 1                | 0              | 2.498053                | -2.179460 | -0.005185 |
| 23               | 1                | 0              | 2.878651                | 2.013842  | 0.646617  |
| 24               | 6                | 0              | 0.416194                | 2.816396  | 0.154031  |
| 25               | 1                | 0              | -0.663314               | 2.824342  | 0.032113  |
| 26               | 6                | 0              | 0.698633                | 3.397741  | 1.553519  |
| 27               | 6                | 0              | 1.000773                | 3.709562  | -0.956150 |
| 28               | 1                | 0              | 0.607056                | 4.727657  | -0.866618 |
| 29               | 1                | 0              | 2.093439                | 3.766388  | -0.895251 |
| 30               | 1                | 0              | 0.726897                | 3.325870  | -1.941511 |
| 31               | 1                | 0              | 0.234338                | 4.385765  | 1.639248  |
| 32               | 1                | 0              | 0.280917                | 2.760685  | 2.339516  |
| 33               | 1                | 0              | 1.767686                | 3.522781  | 1.753274  |
| 34               | 6                | 0              | 0.294445                | -3.490435 | 0.358563  |
| 35               | 1                | 0              | -1.114961               | -2.175460 | -0.536427 |
| 36               | 6                | 0              | 0.194703                | -2.828030 | -2.087993 |
| 37               | 1                | 0              | -0.362439               | -3.748689 | -2.292068 |
| 38               | 1                | 0              | -0.137366               | -2.069715 | -2.799989 |
| 39               | 1                | 0              | 1.257677                | -3.030229 | -2.263402 |
| 40               | 1                | 0              | -0.392928               | -4.328844 | 0.205054  |
| 41               | 1                | 0              | 1.307992                | -3.883765 | 0.229875  |
| 42               | 1                | 0              | 0.193658                | -3.157370 | 1.396872  |
| 43               | 6                | 0              | 4.555954                | -1.147536 | 1.898663  |
| 44               | 6                | 0              | 5.135139                | -0.817201 | -0.553309 |
| 45               | 1                | 0              | 4.740453                | 0.727575  | 0.878379  |
| 46               | 1                | 0              | 5.620548                | -1.210002 | 2.147677  |
| 47               | 1                | 0              | 4.027060                | -0.739334 | 2.765398  |
| 48               | 1                | 0              | 4.193358                | -2.168044 | 1.735455  |
| 49               | 1                | 0              | 6.203453                | -0.870469 | -0.318426 |
| 50               | 1                | 0              | 4.803534                | -1.825612 | -0.823049 |
| 51               | 1                | 0              | 5.010524                | -0.178639 | -1.432939 |

SCF Done: E(RB+HF-LYP) = -1398.00993909 a.u. after 11 cycles  
 Zero-point correction= 0.435861 (Hartree/Particle)

**Electronic Supporting Information for Rouffet *et al.*; *In silico* study of MMP inhibition**

```

Thermal correction to Energy=          0.462708
Thermal correction to Enthalpy=        0.463652
Thermal correction to Gibbs Free Energy= 0.377146
Sum of electronic and zero-point Energies= -1397.574078
Sum of electronic and thermal Energies= -1397.547231
Sum of electronic and thermal Enthalpies= -1397.546287
Sum of electronic and thermal Free Energies= -1397.632794
    
```

*Cis conformation*

| Center<br>Number | Atomic<br>Number | Atomic<br>Type | Coordinates (Angstroms) |           |           |
|------------------|------------------|----------------|-------------------------|-----------|-----------|
|                  |                  |                | X                       | Y         | Z         |
| 1                | 6                | 0              | 1.640370                | -1.617701 | -0.125558 |
| 2                | 6                | 0              | 0.348580                | -1.210859 | -0.489232 |
| 3                | 6                | 0              | 0.085599                | 0.187015  | -0.493252 |
| 4                | 6                | 0              | 1.067986                | 1.119058  | -0.052696 |
| 5                | 6                | 0              | 2.327309                | 0.624689  | 0.296749  |
| 6                | 6                | 0              | 2.646895                | -0.732142 | 0.248596  |
| 7                | 16               | 0              | -1.503504               | 0.857508  | -1.113145 |
| 8                | 8                | 0              | -1.254365               | 2.107257  | -1.833860 |
| 9                | 6                | 0              | 4.037124                | -1.236548 | 0.608092  |
| 10               | 7                | 0              | -2.361894               | 1.334901  | 0.295153  |
| 11               | 7                | 0              | -2.561665               | 0.363554  | 1.254465  |
| 12               | 6                | 0              | -3.824988               | -0.199431 | 1.444457  |
| 13               | 8                | 0              | -4.829864               | 0.225716  | 0.921012  |
| 14               | 8                | 0              | -2.283565               | -0.204276 | -1.738928 |
| 15               | 6                | 0              | -3.804436               | -1.395632 | 2.383548  |
| 16               | 1                | 0              | -2.026515               | 2.223265  | 0.659886  |
| 17               | 1                | 0              | -1.746204               | -0.078262 | 1.666555  |
| 18               | 1                | 0              | -2.960840               | -1.388500 | 3.080252  |
| 19               | 1                | 0              | -4.738827               | -1.409142 | 2.945691  |
| 20               | 1                | 0              | -3.753509               | -2.313940 | 1.789161  |
| 21               | 6                | 0              | 0.880389                | 2.637308  | 0.085015  |
| 22               | 1                | 0              | 3.086213                | 1.333141  | 0.612399  |
| 23               | 1                | 0              | 1.868912                | -2.677939 | -0.138758 |
| 24               | 6                | 0              | -0.638953               | -2.324129 | -0.867110 |
| 25               | 1                | 0              | 4.022694                | -2.327446 | 0.488217  |
| 26               | 6                | 0              | 5.108594                | -0.679456 | -0.347900 |
| 27               | 6                | 0              | 4.392934                | -0.937406 | 2.076561  |
| 28               | 1                | 0              | 5.370795                | -1.361483 | 2.327323  |
| 29               | 1                | 0              | 4.441531                | 0.140695  | 2.263960  |
| 30               | 1                | 0              | 3.652156                | -1.363052 | 2.760429  |
| 31               | 1                | 0              | 6.090558                | -1.101798 | -0.110425 |
| 32               | 1                | 0              | 4.876175                | -0.921056 | -1.389341 |
| 33               | 1                | 0              | 5.187719                | 0.410008  | -0.267116 |
| 34               | 6                | 0              | 1.679687                | 3.389859  | -0.995611 |
| 35               | 1                | 0              | -0.161158               | 2.896165  | -0.089363 |
| 36               | 6                | 0              | 1.237661                | 3.132769  | 1.500506  |
| 37               | 1                | 0              | 1.523410                | 4.469245  | -0.897864 |
| 38               | 1                | 0              | 2.754193                | 3.196021  | -0.908631 |
| 39               | 1                | 0              | 1.351572                | 3.088081  | -1.992836 |
| 40               | 1                | 0              | 0.998861                | 4.197619  | 1.589922  |
| 41               | 1                | 0              | 0.674670                | 2.594708  | 2.270933  |
| 42               | 1                | 0              | 2.301666                | 3.018776  | 1.729266  |

Electronic Supporting Information for Rouffet *et al.*; *In silico* study of MMP inhibition

|    |   |   |           |           |           |
|----|---|---|-----------|-----------|-----------|
| 43 | 6 | 0 | -0.533690 | -3.559365 | 0.048765  |
| 44 | 1 | 0 | -1.650317 | -1.940640 | -0.760118 |
| 45 | 6 | 0 | -0.462028 | -2.726386 | -2.344731 |
| 46 | 1 | 0 | -1.371964 | -4.231356 | -0.161306 |
| 47 | 1 | 0 | 0.382459  | -4.136772 | -0.111510 |
| 48 | 1 | 0 | -0.577526 | -3.287815 | 1.109011  |
| 49 | 1 | 0 | -1.178760 | -3.510289 | -2.611161 |
| 50 | 1 | 0 | -0.635907 | -1.874534 | -3.005168 |
| 51 | 1 | 0 | 0.547069  | -3.112447 | -2.529408 |

```

-----
SCF Done: E(RB+HF-LYP) = -1398.00020502 A.U. after 15 cycles
Zero-point correction= 0.435579 (Hartree/Particle)
Thermal correction to Energy= 0.462486
Thermal correction to Enthalpy= 0.463430
Thermal correction to Gibbs Free Energy= 0.377246
Sum of electronic and zero-point Energies= -1397.564626
Sum of electronic and thermal Energies= -1397.537719
Sum of electronic and thermal Enthalpies= -1397.536775
Sum of electronic and thermal Free Energies= -1397.622959

```

4. *Coordinates and Energies for free deprotonated ligands*

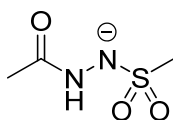

N'-acetylmethanesulfonylhydrazide **3**

```

-----
Center      Atomic      Atomic      Coordinates (Angstroms)
Number      Number      Type        X            Y            Z
-----
1           6           0           2.042313    1.530257    -0.047049

```

Electronic Supporting Information for Rouffet *et al.*; *In silico* study of MMP inhibition

|    |    |   |           |           |           |
|----|----|---|-----------|-----------|-----------|
| 2  | 16 | 0 | 1.372690  | -0.178658 | 0.069072  |
| 3  | 7  | 0 | 0.144781  | -0.257647 | -0.996007 |
| 4  | 7  | 0 | -0.983122 | 0.426136  | -0.497644 |
| 5  | 6  | 0 | -2.132950 | -0.171165 | -0.086509 |
| 6  | 8  | 0 | -2.326324 | -1.374513 | 0.047125  |
| 7  | 8  | 0 | 1.014337  | -0.297557 | 1.506735  |
| 8  | 8  | 0 | 2.464247  | -1.031213 | -0.452067 |
| 9  | 6  | 0 | -3.260736 | 0.828963  | 0.216022  |
| 10 | 1  | 0 | -1.036038 | 1.425652  | -0.669936 |
| 11 | 1  | 0 | -2.990510 | 1.880881  | 0.069407  |
| 12 | 1  | 0 | -4.122930 | 0.595088  | -0.417033 |
| 13 | 1  | 0 | -3.572804 | 0.691874  | 1.255618  |
| 14 | 1  | 0 | 1.263434  | 2.245963  | 0.233172  |
| 15 | 1  | 0 | 2.884235  | 1.626541  | 0.642631  |
| 16 | 1  | 0 | 2.370128  | 1.711043  | -1.072573 |

-----  
 SCF Done: E(RB+HF-LYP) = -851.856161378 a.u. after 10 cycles  
 Zero-point correction= 0.114842 (Hartree/Particle)  
 Thermal correction to Energy= 0.125228  
 Thermal correction to Enthalpy= 0.126172  
 Thermal correction to Gibbs Free Energy= 0.077853  
 Sum of electronic and zero-point Energies= -851.741320  
 Sum of electronic and thermal Energies= -851.730933  
 Sum of electronic and thermal Enthalpies= -851.729989  
 Sum of electronic and thermal Free Energies= -851.778309

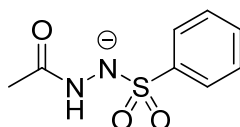

N'-acetylbenzenesulfonylhydrazide 4

| Center Number | Atomic Number | Atomic Type | Coordinates (Angstroms) |           |           |
|---------------|---------------|-------------|-------------------------|-----------|-----------|
|               |               |             | X                       | Y         | Z         |
| 1             | 1             | 0           | -2.412544               | 2.878582  | -0.271593 |
| 2             | 6             | 0           | -3.274440               | 2.211474  | -0.161192 |
| 3             | 1             | 0           | -4.022820               | 2.475333  | -0.915693 |
| 4             | 1             | 0           | -3.726362               | 2.383010  | 0.820021  |
| 5             | 6             | 0           | -2.944712               | 0.716316  | -0.285715 |
| 6             | 8             | 0           | -3.822193               | -0.125716 | -0.132455 |
| 7             | 7             | 0           | -1.638384               | 0.478449  | -0.578606 |
| 8             | 1             | 0           | -1.060651               | 1.286160  | -0.791265 |
| 9             | 7             | 0           | -1.113570               | -0.785576 | -0.921698 |
| 10            | 16            | 0           | -0.118782               | -1.312462 | 0.248828  |
| 11            | 8             | 0           | -0.572982               | -1.122912 | 1.649903  |
| 12            | 8             | 0           | 0.369048                | -2.647446 | -0.159759 |
| 13            | 6             | 0           | 1.352598                | -0.230313 | 0.142399  |
| 14            | 6             | 0           | 1.419708                | 0.943859  | 0.898814  |
| 15            | 6             | 0           | 2.502066                | 1.814546  | 0.744607  |
| 16            | 6             | 0           | 3.523066                | 1.512683  | -0.158420 |
